# Supplementary material for: Pre-diagnostic plasma enterolactone concentrations are associated with lower mortality among individuals with type 2 diabetes: a case-cohort study in the Danish Diet, Cancer and Health cohort
Source: Springer Nature journal article supplement (doi:10.1007/s00125-019-4854-9), 2019-04-08
Supplement: MOESM1 [file 16629098]

**ESM Table 1.**

| Linear by doubling in concentration (log2) | Mortality         |                   |                   |                   |                   |                   |
|--------------------------------------------|-------------------|-------------------|-------------------|-------------------|-------------------|-------------------|
|                                            | All causes        | Diabetes          | Cardiovascular    | Cancer            | Respiratory       | Other             |
| <b>n=596</b>                               | <b>n=274</b>      | <b>n=21</b>       | <b>n=51</b>       | <b>n=130</b>      | <b>n=23</b>       | <b>n=42</b>       |
| <i>Model 2<sup>b</sup></i>                 | 0.89 (0.81, 0.97) | 0.64 (0.46, 0.88) | 0.84 (0.68, 1.03) | 0.92 (0.80, 1.05) | 0.93 (0.76, 1.15) | 0.93 (0.78, 1.11) |
| <i>Model 2<sup>c</sup></i>                 | 0.89 (0.81, 0.97) | 0.62 (0.44, 0.87) | 0.84 (0.68, 1.03) | 0.92 (0.80, 1.05) | 0.92 (0.74, 1.14) | 0.93 (0.78, 1.10) |
| Among non-users*                           |                   |                   |                   |                   |                   |                   |
| <b>n=430</b>                               | <b>n=193</b>      | <b>n=15</b>       | <b>n=38</b>       | <b>n=89</b>       | <b>n=15</b>       | <b>n=31</b>       |
| <i>Model 2<sup>b</sup></i>                 | 0.89 (0.79, 1.00) | 0.60 (0.38, 0.94) | 0.88 (0.69, 1.13) | 0.91 (0.78, 1.08) | 0.93 (0.67, 1.29) | 0.93 (0.75, 1.15) |

<sup>b</sup> adjusted for sex, age (5-year bands), smoking (never, former, current), BMI status (<27, 27-32, >32 kg/m<sup>2</sup>)

<sup>c</sup> adjusted for sex, age (5-year bands), smoking (never, former, current), BMI status (<27, 27-32, >32 kg/m<sup>2</sup>) + antibiotics: 0-3 months before baseline, 3-12 months before baseline or no use (12 months preceding baseline)

\* Sensitivity analyses of non-users of antibiotics (12 months before baseline) among persons with type 2 diabetes with information in the Danish National Prescription Registry the case-cohort study based on the Diet, Cancer and Health cohort (n=430)

**ESM Table 1.** HR (95% CI) for pre-diagnostic plasma enterolactone concentrations and all-cause and cause-specific mortality among persons with type 2 diabetes with information in the Danish National Prescription Registry to adjust for antibiotic medication in the case-cohort study based on the Diet, Cancer and Health cohort (n=596)
